# Supplementary material
Source: publisher figshare collection journal article supplement (https://gsapubs.figshare.com/ndownloader/files/34471220)
Supplement: Supplementary file 1 [file 34471220]

## Sheet: Sheet1
SUPPLEMENTARY TABLE 2. XRF WHOLE ROCK DATA
Sample number	Lat (°N)	Long (°W)	Highly altered?	SiO2	TiO2	Al2O3	Fe2O3	MnO	MgO	CaO	Na2O	K2O	P2O5	Total (normalized)	LOI	Analytical total		F	Cl	S	Sc	V	Cr	Ni	Cu	Zn	Ga	Rb	Sr	Y	Zr	Nb	Ba	La	Ce	Nd	Sm	Pb	Th	U
				Major oxides (Wt. %)														Trace elements (ppm)
Little Cottonwood stock
CH-064	40.5727	111.765	N	N.D.†	N.D.	N.D.	N.D.	N.D.	N.D.	N.D.	N.D.	N.D.	N.D.	N.D.	N.D.	N.D.		N.D.	N.D.	N.D.	N.D.	N.D.	N.D.	N.D.	N.D.	N.D.	N.D.	N.D.	N.D.	N.D.	N.D.	N.D.	N.D.	N.D.	N.D.	N.D.	N.D.	N.D.	N.D.	N.D.
CH-070A	40.5562	111.672	N	70.4021	0.442781	15.5678	2.49567	0.0402528	0.633981	1.42897	3.49193	5.32343	0.173087	100	0.69121	100.063		1074	75	N.D.	3.1	32	2.6	3.5	8.2	66.2	19.2	117.7	511.9	6.7	129.2	13.6	2235	36.2	66.8	27	5.6	22.1	11	3.2
CH-072	40.5564	111.677	N	69.2138	0.593376	15.1361	3.48986	0.0402289	1.26721	2.76574	3.46974	3.79157	0.232322	100	0.538412	99.9694		938	86	N.D.	5.6	50.7	11.5	8.5	12.4	111	18.8	97.8	554.7	8.8	124.9	10.2	1328.6	29.3	52.9	20.4	4.9	16	12.4	2.6
CH-073	40.5562	111.672	N	71.6306	0.51511	15.0998	2.25234	0.050501	0.666613	0.848416	2.36345	6.38332	0.189884	100	1.10169	100.11		1107	72	N.D.	3.5	42.6	9.8	5.5	44.3	76.8	16.8	173.1	339.9	6.5	114.8	11.4	1826.9	29.6	56	18.6	5.2	21.3	9.8	6.2
CH-074	40.5563	111.675	N	68.8317	0.604583	15.4773	3.48643	0.0503819	1.30993	2.50902	3.4965	4.00032	0.233772	100	0.690665	99.9327		799	90	N.D.	6.6	48.8	12.1	9.4	37.3	51	17.8	103.6	544.4	10.4	121.4	11.2	1758.5	33.6	61	25.7	5.4	29.5	11.7	2.7
CH-140	40.5656	111.664	N	N.D.	N.D.	N.D.	N.D.	N.D.	N.D.	N.D.	N.D.	N.D.	N.D.	N.D.	N.D.	N.D.		N.D.	N.D.	N.D.	N.D.	N.D.	N.D.	N.D.	N.D.	N.D.	N.D.	N.D.	N.D.	N.D.	N.D.	N.D.	N.D.	N.D.	N.D.	N.D.	N.D.	N.D.	N.D.	N.D.
CH-141	40.5663	111.665	N	N.D.	N.D.	N.D.	N.D.	N.D.	N.D.	N.D.	N.D.	N.D.	N.D.	N.D.	N.D.	N.D.		N.D.	N.D.	N.D.	N.D.	N.D.	N.D.	N.D.	N.D.	N.D.	N.D.	N.D.	N.D.	N.D.	N.D.	N.D.	N.D.	N.D.	N.D.	N.D.	N.D.	N.D.	N.D.	N.D.
CH-144	40.5697	111.6649*#	N	69.1886	0.535797	15.4775	3.36642	0.0404375	1.05138	2.32516	3.882	3.91233	0.220385	100	0.863629	99.7816		1039	65	830	4.9	44.5	3.7	5.7	59.3	73.6	21	111	611.7	8.1	153	13.3	1622.5	35.4	73.6	26.7	6.3	23.5	13.5	3.6
CH-153	40.5729	111.764	N	N.D.	N.D.	N.D.	N.D.	N.D.	N.D.	N.D.	N.D.	N.D.	N.D.	N.D.	N.D.	N.D.		N.D.	N.D.	N.D.	N.D.	N.D.	N.D.	N.D.	N.D.	N.D.	N.D.	N.D.	N.D.	N.D.	N.D.	N.D.	N.D.	N.D.	N.D.	N.D.	N.D.	N.D.	N.D.	N.D.
CH-154	40.5729	111.764	N	N.D.	N.D.	N.D.	N.D.	N.D.	N.D.	N.D.	N.D.	N.D.	N.D.	N.D.	N.D.	N.D.		N.D.	N.D.	N.D.	N.D.	N.D.	N.D.	N.D.	N.D.	N.D.	N.D.	N.D.	N.D.	N.D.	N.D.	N.D.	N.D.	N.D.	N.D.	N.D.	N.D.	N.D.	N.D.	N.D.
CH-168	40.5429	111.678	N	N.D.	N.D.	N.D.	N.D.	N.D.	N.D.	N.D.	N.D.	N.D.	N.D.	N.D.	N.D.	N.D.		N.D.	N.D.	N.D.	N.D.	N.D.	N.D.	N.D.	N.D.	N.D.	N.D.	N.D.	N.D.	N.D.	N.D.	N.D.	N.D.	N.D.	N.D.	N.D.	N.D.	N.D.	N.D.	N.D.
CH-169	40.5495	111.676	N	N.D.	N.D.	N.D.	N.D.	N.D.	N.D.	N.D.	N.D.	N.D.	N.D.	N.D.	N.D.	N.D.		N.D.	N.D.	N.D.	N.D.	N.D.	N.D.	N.D.	N.D.	N.D.	N.D.	N.D.	N.D.	N.D.	N.D.	N.D.	N.D.	N.D.	N.D.	N.D.	N.D.	N.D.	N.D.	N.D.
FC	40.5705	111.638	N	71.4994	0.293237	15.4304	2.3459	0.0505582	0.758372	2.18411	4.59068	2.75036	0.0970717	100	0.54	99.436		766	N.D.	81	4	25.2	10.5	7.7	1.6	49.7	20.9	82.6	848.4	6	116.7	6.3	991.4	19.6	44.4	16.4	5.2	31.7	8.1	2.4
CC	40.5111	111.836	N	70.3939	0.531198	16.0177	3.34042	0.0408614	1.18498	1.57316	3.63666	3.05439	0.226781	100	1.4	99.292		563	N.D.	75	4.5	50.1	5.1	10.7	4.7	51.2	17.5	61.1	596.5	7.9	173.9	8.3	2165.8	56.1	96.9	38.9	8.3	18.9	13.7	2.2
HFT	40.5718	111.717	N	70.0573	0.49457	14.7967	3.60329	0.0605596	1.11026	2.8463	3.68404	3.12891	0.218014	100	0.48	99.556		951	N.D.	81	6	45.7	5.5	7.9	4.6	83.4	20.5	104	535.2	7.9	143.3	11.9	568.6	32	59.3	25.4	5.7	23.7	11.9	4.5
SL	40.52	111.674	N	72.482	0.32435	14.6768	2.26031	0.0506796	0.810874	1.70284	3.57798	4.00369	0.110482	100	0.66	99.319		652	N.D.	92	4.3	27.6	11	10.8	1.7	39	18.1	129.2	371.4	7.8	109.1	15.2	967.7	30.4	59.9	21	5.9	34	16.2	4.7
TQ	40.5727	111.763	N	72.795	0.353129	14.1151	2.35083	0.050447	0.867688	2.46181	3.51111	3.36986	0.125108	100	0.41	99.524		602	N.D.	82	5.2	31.5	11	10.6	4.1	38.9	17.3	102.6	455.1	9.5	99.6	14.4	1114.7	23.1	43	19.3	4.9	31.6	9.3	3.1
LC-12	40.5748	111.702	N	68.7348	0.477114	16.5366	2.86268	0.0406054	0.883168	2.69011	4.1316	3.42101	0.222315	100	0.75	99.259		785	N.D.	96	5.6	38.1	4.5	5.5	5	59.9	20.7	94.1	701.8	6.7	133.6	9.7	1386.5	38.7	70.3	24.7	6.1	21.6	11.7	3
LC-23	40.6232	111.77	N	67.0661	0.617421	16.2149	3.99806	0.0506083	1.38667	3.18832	4.00818	3.20857	0.261139	100	0.57	99.368		862	N.D.	85	7.4	56.4	8.4	9.2	15.9	65.4	21.2	94.3	697.5	10.7	154.9	12.9	1557.9	44.3	78.2	30.7	6.9	25.9	12.3	2.6
LC-27	40.4967	111.82	N	66.9239	0.631262	15.9546	4.31702	0.0814531	1.75124	3.75703	3.56357	2.76941	0.250468	100	0.92	99.136		591	N.D.	82	8.4	68.4	25.6	18.3	12.6	64.1	18.8	63.6	731.1	17	169.7	14.9	2126.2	51	87.2	36.3	7.8	19.3	12.7	1.8
LC-36	40.5316	111.746	N	68.5739	0.578041	15.455	3.53923	0.0507053	1.29806	3.08288	3.51895	3.68121	0.222089	100	0.46	99.069		787	N.D.	78	6.9	49.5	12.4	9.9	4.6	58.4	19.7	104.6	589.7	10.8	137.6	12.1	1455	36.4	67	27.9	6.1	29.1	11.5	2.7
LC-SB	40.5768	111.669	N	69.0704	0.547534	15.3715	3.39674	0.0506976	1.05451	2.88976	3.67051	3.74148	0.206846	100	0.43	99.054		839	N.D.	90	6.5	46.7	6	7.7	9.5	69.5	20.3	104.1	594.5	9.8	147.1	13.6	1374	40.4	72.2	29.6	6.3	24.7	14	3.3
DP2015-476	40.5193	111.763	N	68.7471	0.578645	15.2275	3.45157	0.0507583	1.32987	3.11656	3.88809	3.40081	0.209124	100	0.57	99.076
Red Pine porphyry
CH-053	40.5677	111.687	N	70.698	0.501404	15.1123	2.89811	0.0401123	0.641797	2.27637	3.70036	3.93101	0.200562	100	0.292104	100.012		880	76	N.D.	4	29.3	1.1	2.1	10.9	51.9	19.5	108.3	570.8	6.3	191.1	13.2	1653.7	42.7	80.1	32.8	6.5	24.7	11.6	3.3
CH-115	40.5722	111.6822*	Y	74.132	0.321092	14.4491	2.1473	0.0100341	0.521774	0.0702388	2.20751	5.99037	0.150512	100	0	99.66		1682	71	2471	1.4	15.6	2.1	1.9	30.1	38.2	18.3	214.4	250.4	3.1	152	16	1261.9	49.7	105.2	33.8	7.3	99	16.8	7.6
CH-118	40.5639	111.686	Y	68.7189	0.355006	17.0606	2.6879	0.020286	0.84187	0	0.456436	9.70687	0.152145	100	2.7771	101.367		2106	47	3926	0.2	64.8	0.3	0.5	53.3	49.8	36.7	358	189.4	0.1	186.3	13.7	1787.6	44.3	87.8	28.6	5.7	386.6	31.4	8.5
White Pine intrusion
CH-031	40.5539	111.68	Y	72.9162	0.332571	15.1424	1.82914	0.0103928	0.415714	0.0311785	0.800249	8.45978	0.0623571	100	0	97.3746		N.D.	N.D.	N.D.	0	30.8	0.7	2.7	547.6	226.1	25.8	304.5	153.2	0.1	144.9	16.6	1491.5	28.1	50.4	17	4	73	17.2	6
CH-041	40.565	111.685	N	74.1213	0.32888	14.6249	1.46968	0	0.308325	0.770812	3.17575	5.11819	0.0822199	100	0	98.4676		N.D.	N.D.	N.D.	0	19.7	1.3	3.2	33.5	19.2	20.9	135.9	388.3	2.3	142.8	12.7	1537.2	24.9	48.3	19.5	5	24	11.1	4.3
CH-041-2	40.565	111.685	N	72.8375	0.330761	14.5936	2.18503	0.0100231	0.511176	1.76406	3.75864	3.89897	0.110254	100	0	99.77		721	70	201	0.8	28.2	2.1	7.3	33.8	26.3	22.8	92.9	569.6	3.6	158.8	12.2	1218.1	47	85.7	33.3	6.6	20.7	12.2	2.9
CH-043-2	40.5671	111.688	N	71.2836	0.371635	15.217	2.2499	0.0301326	0.602652	2.03897	3.98755	4.07794	0.140619	100	0	99.56		826	64	0	2.7	26.1	1.3	4.6	24	46.6	21.8	118.5	601.4	6.5	152.9	12.8	1664.4	39.1	79.9	31.3	6.5	26.8	15.8	3.3
CH-067	40.568	111.685	N	74.0297	0.392864	14.405	1.55131	0.0100734	0.423084	0.654773	2.89108	5.46988	0.172256	100	1.0564	100.327		1337	71	N.D.	1.6	29.9	2.1	2	61	24.8	18.4	144.8	361.3	2.6	149.4	13.9	1632.8	26.6	53.8	19.3	4.8	27.3	10.1	3.5
CH-068	40.5651	111.682	Y	80.1046	0.321948	10.9563	1.72041	0	0.382313	0.553348	2.42467	3.471	0.0653956	100	1.21491	100.61		808	68	N.D.	1.3	22.7	0.8	2.7	32.1	15.8	14.3	91.4	312.4	1.1	135.5	9.5	1141.7	34.2	62.2	24.7	5.7	16.8	6.4	2.6
CH-069	40.564	111.68	N	73.6051	0.413966	14.7109	1.75683	0.0201935	0.444256	0.52503	2.88766	5.51281	0.12318	100	1.26367	100.306		1379	71	N.D.	2.1	29	1.6	1.8	81.3	33.6	19.2	153.5	364.9	1.8	168.6	13.5	1529.2	31.2	58.7	22.2	4.9	30.6	12.7	5.1
CH-070B	40.5562	111.671	Y	72.7358	0.408743	14.9907	2.01306	0.0102186	0.50071	0.07153	2.41158	6.73404	0.123645	100	2.30216	100.163		1422	71	N.D.	1.6	31	3	1.5	48.2	19.9	18.9	197.3	246.4	1.7	180.7	14.3	1656.9	51.1	94.1	40.2	6.8	21.3	12.5	4.9
CH-071	40.556	111.671	N	71.1292	0.423089	15.0499	2.77022	0.0503677	0.715221	2.19603	3.94883	3.52574	0.191397	100	0.761409	100.031		1589	79	N.D.	4.1	30.7	2.4	4.8	102.5	223.6	21	122.9	533.2	12.8	159.9	14.5	962.4	46.2	87.5	36.9	7.2	23	17.3	5.7
CH-107	40.5553	111.696	N	73.345	0.350645	15.1078	2.39441	0.0300553	0.540995	0.751383	3.44634	3.89717	0.136251	100	2.20748	102.023		1745	68	3947	1.4	23	2.8	3.2	20.2	49.3	19.9	125.7	206.5	7.8	140.4	11.8	1107.5	37.7	70.5	28.5	5.7	26.3	10.1	3.9
CH-108	40.5549	111.696	N	73.4733	0.352414	14.8719	2.28566	0.0503449	0.513518	0.795449	3.33283	4.19876	0.125862	100	0	99.315		2077	82	1466	0.8	27.6	3.1	4.2	62.9	142.2	21.3	165.8	266.2	5.7	157.1	12.2	1491.9	46.2	83.2	33.8	7.5	30.5	12.8	4.5
CH-111	40.5516	111.6768*	Y	73.8138	0.340849	15.3983	1.79447	0.0300749	0.400998	0.260649	3.70924	4.09018	0.161402	100	1.35384	101.105		1053	64	252	0.9	32.1	1.6	6	634.8	87.3	19.7	123.3	342.2	17.9	167.2	12.8	1556.2	63.9	136	56.2	10.1	30.2	13.5	5.4
CH-114	40.5526	111.691	Y	66.4171	0.552283	17.3253	2.63868	0.0102275	0.409098	0	0.531828	11.9968	0.118639	100	2.80923	100.585		1600	46	9471	0.9	74.6	1.2	0	56.5	40	32.4	344.2	329.9	1.2	224.2	18.2	3077.7	51.4	102.8	32.5	5.4	785.9	88.3	6.8
CH-125	40.5542	111.679	N	71.5408	0.423199	15.346	2.65003	0.0403047	0.604571	1.53158	3.47628	4.22192	0.165249	100	0	99.244		1443	74	78	3.4	32.6	2.2	4.3	78.1	128.8	20.6	123.2	496.6	6.4	164.2	13.1	1624.1	54.4	101	38.3	7.8	24.8	11.8	4.2
CH-126	40.554	111.679	N	72.4126	0.401958	14.7619	2.63282	0.0401958	0.562741	1.67817	3.37644	3.97938	0.153749	100	0	99.513		1134	68	659	3.9	30.2	2.3	3.4	50.8	53.2	19.3	112.1	478.2	5.7	151.1	12.9	1136.6	45.2	80	31.5	6.7	27.8	13.9	3.7
CH-127	40.5541	111.679	N	71.7252	0.4425	15.3266	2.66506	0.0402273	0.623523	1.49847	3.43943	4.07301	0.165938	100	0	99.435		1304	70	150	3.1	34.1	1.9	4.5	103.8	110.8	19.8	117.7	486.6	5.7	160.5	12.7	1325.1	47.2	109.7	34.8	8.1	26.1	13.2	4.1
CH-128	40.5538	111.68	N	71.5722	0.472523	15.4324	2.72455	0.0201074	0.663543	1.48795	3.59922	3.85056	0.176945	100	0	99.466		1488	73	657	3.7	35.6	2.6	4	131.7	49.7	20.8	114.1	513.8	8.5	184.7	14.4	1422.7	74.2	129.8	53.9	9.6	29	13.1	3.8
CH-129	40.5538	111.68	N	72.5531	0.431744	14.9102	2.69087	0.0301217	0.54219	1.07434	3.1929	4.40781	0.166673	100	0	99.596		1673	59	1065	2.6	36.9	3	3.6	346.8	83.8	18	137.5	276.4	7.4	164	12	1218.9	56.7	97.3	41.1	7.8	26.4	11	4.3
CH-130	40.5561	111.681	N	72.1399	0.414539	14.9133	2.81078	0.0101107	0.495425	0.889743	3.45786	4.70148	0.166827	100	1.32174	100.227		1560	51	1881	1.6	37.6	2.6	2.8	82.6	75.4	21.6	141.5	426.3	5.1	188.8	13.6	1580.5	37.4	73.6	30.1	6.3	38.7	14.5	3.7
CH-131	40.5564	111.681	N	N.D.	N.D.	N.D.	N.D.	N.D.	N.D.	N.D.	N.D.	N.D.	N.D.	N.D.	N.D.	N.D.		N.D.	N.D.	N.D.	N.D.	N.D.	N.D.	N.D.	N.D.	N.D.	N.D.	N.D.	N.D.	N.D.	N.D.	N.D.	N.D.	N.D.	N.D.	N.D.	N.D.	N.D.	N.D.	N.D.
CH-132	40.5564	111.68	N	N.D.	N.D.	N.D.	N.D.	N.D.	N.D.	N.D.	N.D.	N.D.	N.D.	N.D.	N.D.	N.D.		N.D.	N.D.	N.D.	N.D.	N.D.	N.D.	N.D.	N.D.	N.D.	N.D.	N.D.	N.D.	N.D.	N.D.	N.D.	N.D.	N.D.	N.D.	N.D.	N.D.	N.D.	N.D.	N.D.
CH-133	40.5559	111.681	N	N.D.	N.D.	N.D.	N.D.	N.D.	N.D.	N.D.	N.D.	N.D.	N.D.	N.D.	N.D.	N.D.		N.D.	N.D.	N.D.	N.D.	N.D.	N.D.	N.D.	N.D.	N.D.	N.D.	N.D.	N.D.	N.D.	N.D.	N.D.	N.D.	N.D.	N.D.	N.D.	N.D.	N.D.	N.D.	N.D.
CH-134	40.5562	111.681	N	N.D.	N.D.	N.D.	N.D.	N.D.	N.D.	N.D.	N.D.	N.D.	N.D.	N.D.	N.D.	N.D.		N.D.	N.D.	N.D.	N.D.	N.D.	N.D.	N.D.	N.D.	N.D.	N.D.	N.D.	N.D.	N.D.	N.D.	N.D.	N.D.	N.D.	N.D.	N.D.	N.D.	N.D.	N.D.	N.D.
CH-135	40.5605	111.671	N	72.4137	0.445561	15.0883	2.82526	0.0202528	0.69872	0.820237	2.85564	4.63788	0.194426	100	1.95764	100.71		1880	51	1870	1.4	37.4	1.6	4	175.2	71.2	21.9	173.3	371.2	8.7	163.4	15.2	3475.7	41.9	75.2	39.1	7.3	51.1	15.8	6
CH-138	40.5633	111.676	Y	74.3116	0.45159	14.9526	1.82643	0	0.501766	0.230812	2.91024	4.66643	0.148523	100	1.74412	101.392		2054	47	474	0.4	26.1	0	2.5	84.3	28.7	18.9	158.8	270.1	4.9	211.6	12.8	1800.1	25.3	51.8	22.8	5.6	23.6	9.6	3.9
CH-156	40.5744	111.681	Y	71.9876	0.381258	15.5814	1.59526	0.0501655	0.622053	1.37454	4.2741	4.00321	0.13043	100	0	99.67		1035	68	378	1.3	28.9	0.6	5.3	432.9	130.2	23	115.3	530.5	9.4	179.8	10.8	1373.9	48.8	94.5	35.7	7.5	20.7	14.3	3.8
CH-157	40.5536	111.68	Y	84.8369	0.260913	9.10186	1.98695	0.0100351	0.521826	0.0100351	0.0401405	3.1711	0.0602107	100	0	99.65		2451	57	10471	0	38.3	0.7	4.8	134.1	371	24.3	170.1	17.4	3.2	145.3	13.8	592.7	37.8	72.1	32.4	7	82.3	34.7	11
CH-158	40.5583	111.679	N	N.D.	N.D.	N.D.	N.D.	N.D.	N.D.	N.D.	N.D.	N.D.	N.D.	N.D.	N.D.	N.D.		N.D.	N.D.	N.D.	N.D.	N.D.	N.D.	N.D.	N.D.	N.D.	N.D.	N.D.	N.D.	N.D.	N.D.	N.D.	N.D.	N.D.	N.D.	N.D.	N.D.	N.D.	N.D.	N.D.
CH-159	40.5528	111.679	N	70.6006	0.431164	15.3916	2.74742	0.0300812	0.721949	2.17587	3.99078	3.75013	0.160433	100	0	99.73		1005	58	573	2	32.5	2.5	5.8	46.4	53.2	23.5	114.9	644.8	6.5	188.8	14.1	1695.9	53.4	102.5	39.5	7.9	25.5	16.5	3.2
CH-160	40.5532	111.677	N	70.4614	0.451354	15.3862	2.72818	0.0401204	0.792377	2.25677	4.17252	3.54062	0.170512	100	0	99.7		949	66	404	3	32.6	1.5	6.3	87.5	64.4	23.3	113.2	621.4	7.9	194.2	16.7	1268.7	58.7	104.7	40	8.3	22.5	16.6	3.6
CH-164	40.5718	111.676	N	N.D.	N.D.	N.D.	N.D.	N.D.	N.D.	N.D.	N.D.	N.D.	N.D.	N.D.	N.D.	N.D.		N.D.	N.D.	N.D.	N.D.	N.D.	N.D.	N.D.	N.D.	N.D.	N.D.	N.D.	N.D.	N.D.	N.D.	N.D.	N.D.	N.D.	N.D.	N.D.	N.D.	N.D.	N.D.	N.D.
CH-166	40.5532	111.694	N	N.D.	N.D.	N.D.	N.D.	N.D.	N.D.	N.D.	N.D.	N.D.	N.D.	N.D.	N.D.	N.D.		N.D.	N.D.	N.D.	N.D.	N.D.	N.D.	N.D.	N.D.	N.D.	N.D.	N.D.	N.D.	N.D.	N.D.	N.D.	N.D.	N.D.	N.D.	N.D.	N.D.	N.D.	N.D.	N.D.
CH-176	40.5521	111.695	N	N.D.	N.D.	N.D.	N.D.	N.D.	N.D.	N.D.	N.D.	N.D.	N.D.	N.D.	N.D.	N.D.		N.D.	N.D.	N.D.	N.D.	N.D.	N.D.	N.D.	N.D.	N.D.	N.D.	N.D.	N.D.	N.D.	N.D.	N.D.	N.D.	N.D.	N.D.	N.D.	N.D.	N.D.	N.D.	N.D.
CH-177	40.5571	111.697	N	N.D.	N.D.	N.D.	N.D.	N.D.	N.D.	N.D.	N.D.	N.D.	N.D.	N.D.	N.D.	N.D.		N.D.	N.D.	N.D.	N.D.	N.D.	N.D.	N.D.	N.D.	N.D.	N.D.	N.D.	N.D.	N.D.	N.D.	N.D.	N.D.	N.D.	N.D.	N.D.	N.D.	N.D.	N.D.	N.D.
CH-178	40.5641	111.697	N	N.D.	N.D.	N.D.	N.D.	N.D.	N.D.	N.D.	N.D.	N.D.	N.D.	N.D.	N.D.	N.D.		N.D.	N.D.	N.D.	N.D.	N.D.	N.D.	N.D.	N.D.	N.D.	N.D.	N.D.	N.D.	N.D.	N.D.	N.D.	N.D.	N.D.	N.D.	N.D.	N.D.	N.D.	N.D.	N.D.
CH-179	40.569	111.692	N	N.D.	N.D.	N.D.	N.D.	N.D.	N.D.	N.D.	N.D.	N.D.	N.D.	N.D.	N.D.	N.D.		N.D.	N.D.	N.D.	N.D.	N.D.	N.D.	N.D.	N.D.	N.D.	N.D.	N.D.	N.D.	N.D.	N.D.	N.D.	N.D.	N.D.	N.D.	N.D.	N.D.	N.D.	N.D.	N.D.
Rhyolites
CH-040	40.5666	111.686	Y	78.0167	0.051435	14.1961	0.534924	0.030861	0.051435	0.010287	1.22415	5.86359	0.020574	100	0	98.3765		N.D.	N.D.	N.D.	2.8	0	0.3	3.3	31.1	42.8	29.5	253.3	52.1	19.1	59.4	51.9	151.5	9.9	28.6	15.5	3.8	85.4	17.8	12.4
CH-096	40.5599	111.683	Y	78.6739	0.0503997	14.1321	0.473757	0.0100799	0.0806395	0.0201599	1.12895	5.41292	0.0171359	100	1.47208	100.679		835	69	N.D.	4	2.6	1	2.8	86.5	32.6	27.2	205.5	47.7	16	56.7	48.5	138.6	9.7	11.1	9.7	3.1	35.9	15.3	8.7
CH-109	40.5601	111.697	Y	77.3915	0.0500786	12.1891	0.450708	0	0.0300472	0.0200314	0.340535	9.51494	0.0130204	100	0.430961	100.274		558	71	0	1.6	9.2	0.9	0.6	1.5	15.3	21.4	298	290.4	4.8	43	21.2	683.5	13	24.6	5.8	2.8	96.8	10.3	8.4
CH-113	40.5526	111.691	Y	78.0114	0.0400521	12.6364	1.13147	0.010013	0.130169	0.120156	1.74226	6.14799	0.0300391	100	0.877102	100.747		656	69	9	5.2	10.9	0.9	2	28.6	30.7	24.1	201.8	299.4	8.5	56.6	37.1	616.5	6.2	12.7	4.8	2.7	94.1	14.8	8.6
CH-136	40.5633	111.677	Y	78.4567	0.040034	13.6216	0.490417	0.0300255	0.100085	0.27023	1.56133	5.4146	0.0150128	100	0	99.915		2165	74	0	4.8	1.5	1	2.1	17.6	65.8	27.8	246.7	56.1	13.9	55.6	49.2	135.3	6.6	13.5	8.1	3.3	34.7	15.9	13
CH-139	40.5637	111.676	Y	77.6073	0.0400244	13.7484	0.460281	0.0300183	0.190116	0.160098	2.63161	5.12313	0.00900549	100	0	99.939		1509	75	0	4.4	0.5	0.6	2.8	31.6	25.2	27.1	239.3	73.4	16.1	54.4	48.1	113.7	3.8	14.5	8.5	2.7	39.2	15.3	14.6
Pebble Dikes
CH-027	40.4781	111.853	Y	92.9761	0.0925545	3.87701	0.637598	0	0.185109	0.442205	0.113122	1.59399	0.0822707	100	0	98.4069		N.D.	N.D.	N.D.	0	11.5	14.6	8.6	8.6	14.8	7.8	58.5	172.8	12	104.2	10.1	738.4	8.2	21.8	15.1	4.3	15.6	4.5	6.3
CH-036	40.479	111.849	Y	82.1075	0.422332	8.92048	2.36918	0.0309023	0.504738	1.75113	1.49361	2.15286	0.247219	100	0	98.245		N.D.	N.D.	N.D.	4.9	160.8	12	9	26.9	39.4	12.3	67.7	413.6	14.9	164.1	6.9	1106	32.5	66.6	27.4	6.5	25.6	8	4.3
CH-061	40.478	111.852	N	N.D.	N.D.	N.D.	N.D.	N.D.	N.D.	N.D.	N.D.	N.D.	N.D.	N.D.	N.D.	N.D.		N.D.	N.D.	N.D.	N.D.	N.D.	N.D.	N.D.	N.D.	N.D.	N.D.	N.D.	N.D.	N.D.	N.D.	N.D.	N.D.	N.D.	N.D.	N.D.	N.D.	N.D.	N.D.	N.D.
CH-062	40.4778	111.852	Y	N.D.	N.D.	N.D.	N.D.	N.D.	N.D.	N.D.	N.D.	N.D.	N.D.	N.D.	N.D.	N.D.		N.D.	N.D.	N.D.	N.D.	N.D.	N.D.	N.D.	N.D.	N.D.	N.D.	N.D.	N.D.	N.D.	N.D.	N.D.	N.D.	N.D.	N.D.	N.D.	N.D.	N.D.	N.D.	N.D.
CH-066	40.4731	111.836	Y	N.D.	N.D.	N.D.	N.D.	N.D.	N.D.	N.D.	N.D.	N.D.	N.D.	N.D.	N.D.	N.D.		N.D.	N.D.	N.D.	N.D.	N.D.	N.D.	N.D.	N.D.	N.D.	N.D.	N.D.	N.D.	N.D.	N.D.	N.D.	N.D.	N.D.	N.D.	N.D.	N.D.	N.D.	N.D.	N.D.
CH-095	40.553	111.68	Y	73.6173	0.426002	13.7741	2.8603	0.0608575	0.923005	1.45044	2.55601	4.15859	0.173444	100	1.62447	100.215		2012	66	N.D.	4.7	46.1	12.1	8.5	163.4	249.8	19.3	149.6	319.7	8.9	120	12.1	1256.3	46.4	83.6	35.3	6.8	310.9	16.9	3.7
Oquirrh Group
CH-080	40.461	111.89759*	N	97.4402	0.0100031	1.02032	0.770239	0.0800248	0.150047	0.210065	n.d.§	0.280087	0.0390121	100	0.796673	100.766		448	78	n.d.	0.8	23.2	11	20.3	3.6	7.8	2.4	8.1	11.2	6.2	89.9	0.6	261.7	9.5	11.1	18.4	4.4	2.3	0.8	0.6
CH-081	40.462	111.891	N	91.8144	0.0502432	2.41167	5.32578	n.d.	0.0803891	0.0602918	n.d.	0.22107	0.0361751	100	1.67049	101.186		83	66	6	n.d.	37.9	13.7	11.5	5.9	2.1	3.2	5.8	9	4.9	128.9	1.4	224.8	5.7	9.9	20.4	5	5.1	1.2	1.4
CH-082	40.4628	111.891	N	93.0738	0.051496	1.09171	0.226582	n.d.	2.00834	3.07946	n.d.	0.453164	0.0154488	100	4.82054	101.916		441	80	n.d.	3.1	4.3	5.4	5.2	n.d.	1.6	2.7	8.4	10.1	2.3	116.5	0.6	85.1	3.7	5.9	7.6	2.5	1.8	1.3	1
CH-083	40.463	111.896	N	95.8525	0.0503586	1.20861	0.503586	n.d.	0.624446	1.00717	n.d.	0.735235	0.0181291	100	1.57711	100.865		467	81	15	1.2	5.9	8.1	5.7	n.d.	1.5	2.8	11.9	11.3	2.9	121.5	0.6	165.8	2.7	10.3	11.3	3.4	2.1	1.7	1.3
CH-084	40.4637	111.896	N	95.099	0.0500205	2.26093	0.340139	n.d.	0.310127	0.480197	n.d.	1.44059	0.0190078	100	1.12214	101.081		476	93	n.d.	0.6	5.7	10.4	5.7	n.d.	1.5	2.9	21.6	12.3	3.1	186.4	0.9	136	3.7	7.4	10.4	3.7	2.2	1.5	1.4
CH-085	40.4657	111.903	N	69.8329	0.0349048	1.54745	3.88607	0.0349048	2.68767	21.1058	n.d.	0.628287	0.242007	100	16.6483	102.596		696	117	346	n.d.	19.5	37.8	28.7	3.1	506.2	3.3	10.6	80.6	10.5	62.7	2.1	147.2	5.4	7.7	n.d.	n.d.	3.4	n.d.	3.6
Note: Normalized to 100% on a volatile-free basis.
†N.D. = No data.
§n.d. = Not detected.
#Asterisks indicate approximate location.
